# Supplementary material for: EGFRvIII-specific CAR-T cells produced by piggyBac transposon exhibit efficient growth suppression against hepatocellular carcinoma
Source: PubMed Central journal article supplement (PMC7330669; doi:10.7150/ijms.45603), 2020-06-05
Supplement: ijmsv17p1406s1.pdf [file ijmsv17p1406s1.pdf]

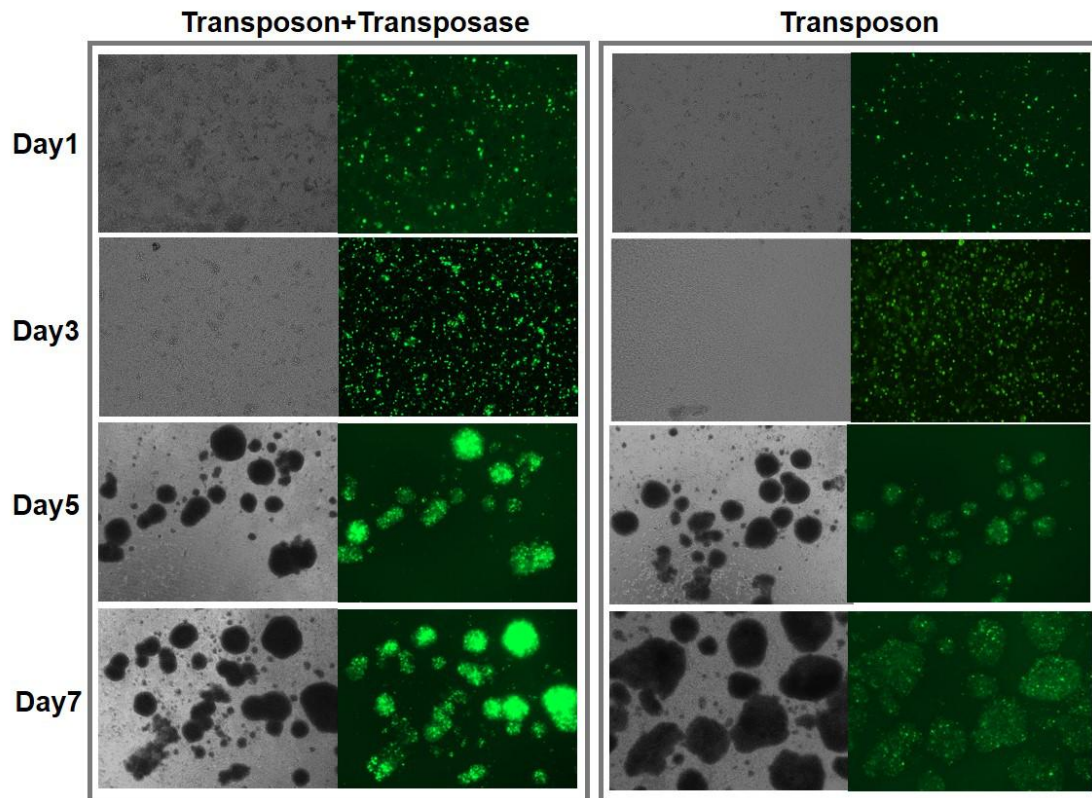

**Figure S1.** GFP expression was recorded by fluorescence microscope at day 1, 3, 5 and 7. The expression efficiency of foreign gene was gradually increased as electrotransfected with both transposase and transposon, while the opposite without transposase.
